# Supplementary material for: Pharmacist-Led Collaborative Medication Management for the Elderly with Chronic Kidney Disease and Polypharmacy
Source: MDPI journal article supplement (doi:10.3390/ijerph18084370), 2021-04-20
Supplement: s1 [file s1]

Supplementary Table.

Type of interventions and drug related problems depending on the target

|                                                                       |                    |
|-----------------------------------------------------------------------|--------------------|
| <b>Interventions delivered to patients</b>                            | <b>214 (60.5%)</b> |
| <b>D5 Therapy stopped</b>                                             | <b>87 (40.7%)</b>  |
| C1.2 Contraindication                                                 | 33                 |
| C1.4 Drug not indicated                                               | 28                 |
| C1.5 Duplication                                                      | 17                 |
| C1.6 Adverse effect                                                   | 8                  |
| C3.4 Dose not adjusted to organ function                              | 1                  |
| <b>D7 In-depth counselling of patient (e.g., on adherence)</b>        | <b>46 (21.5%)</b>  |
| C5.1 Insufficient compliance                                          | 28                 |
| C5.3 Concerns about the treatment                                     | 11                 |
| C4.1 Inappropriate timing or frequency of admin                       | 6                  |
| C5.2 Insufficient knowledge                                           | 1                  |
| <b>D12 Proposition of therapy monitoring</b>                          | <b>42 (19.6%)</b>  |
| C1.6 Adverse effect                                                   | 25                 |
| C3.3 Inappropriate monitoring                                         | 6                  |
| C1.3 Interaction                                                      | 4                  |
| C1.5 Duplication                                                      | 3                  |
| C5.3 Concerns about the treatment                                     | 2                  |
| C1.2 Contraindication                                                 | 1                  |
| C5.1 Insufficient compliance                                          | 1                  |
| <b>D6 Therapy started</b>                                             | <b>12 (5.6%)</b>   |
| C1.1 No concordance with guidelines, only suboptimal therapy possible | 10                 |
| C1.6 Adverse effect                                                   | 2                  |
| <b>D11 Transmission of information</b>                                | <b>9 (4.2%)</b>    |
| C3.3 Inappropriate monitoring                                         | 5                  |
| C5.1 Insufficient compliance                                          | 4                  |
| <b>D4 Optimization of administration/route</b>                        | <b>9 (4.2%)</b>    |
| C4.1 Inappropriate timing or frequency of admin                       | 2                  |
| C5.3 Concerns about the treatment                                     | 1                  |
| C1.3 Interaction                                                      | 6                  |
| <b>D2 Dose adjustment</b>                                             | <b>8 (3.7%)</b>    |
| C1.6 Adverse effect                                                   | 3                  |
| C3.4 Dose not adjusted to organ function                              | 2                  |
| C4.1 Inappropriate timing or frequency of admin                       | 1                  |
| C3.2 Overdose                                                         | 2                  |
| <b>D1 Substitution</b>                                                | <b>1 (0.5%)</b>    |
| C1.1 No concordance with guidelines, only suboptimal therapy possible | 1                  |
| <b>Interventions delivered to physicians</b>                          | <b>140 (39.5%)</b> |

|                                                                       |                   |
|-----------------------------------------------------------------------|-------------------|
| <b>D10 Clarification / addition of information</b>                    | <b>82 (58.6%)</b> |
| C1.7 Missing patient documentation (medication history)*              | 82                |
| <b>D5 Therapy stopped</b>                                             | <b>24 (17.1%)</b> |
| C1.4 Drug not indicated                                               | 12                |
| C1.5 Duplication                                                      | 7                 |
| C1.6 Adverse effect                                                   | 2                 |
| C1.2 Contraindication                                                 | 2                 |
| C3.4 Dose not adjusted to organ function                              | 1                 |
| <b>D2 Dose adjustment</b>                                             | <b>16 (11.4%)</b> |
| C1.6 adverse effect                                                   | 2                 |
| C3.4 Dose not adjusted to organ function                              | 6                 |
| C3.2 Overdose                                                         | 8                 |
| <b>D6 Therapy started</b>                                             | <b>12 (8.6%)</b>  |
| C1.1 No concordance with guidelines, only suboptimal therapy possible | 11                |
| C1.6 adverse effect                                                   | 1                 |
| <b>D1 Substitution</b>                                                | <b>6 (4.3%)</b>   |
| C1.2 Contraindication                                                 | 4                 |
| C1.1 No concordance with guidelines, only suboptimal therapy possible | 1                 |
| C2.1 Inappropriate dosage form/administration route                   | 1                 |
